# Supplementary material for: Rational construction of a novel probe for the rapid detection of butyrylcholinesterase stress changes in apoptotic cells
Source: Royal Society of Chemistry journal article supplement (doi:10.1039/d2nj01678h), 2022-01-01
Supplement: d2nj01678h1.pdf [file d2nj01678h1.pdf]

# Rational construction of the novel probe for rapid detection of stress changes in butyrylcholinesterase in apoptotic cells

Zhenqing Yu<sup>a</sup>, Xiang Li<sup>a, b</sup>, Xiaofeng Lu<sup>a\*</sup>, and Yong Guo<sup>a\*</sup>

<sup>a</sup>Key Laboratory of Chemistry of Northwestern Plant Resources and Key Laboratory for Natural Medicine of Gansu Province, Lanzhou Institute of Chemical Physics, Chinese Academy of Sciences, Lanzhou, 730000, P. R. China; <sup>b</sup>University of Chinese Academy of Sciences, Beijing, 100049, P. R. China.

## Contents

|                                                                                      |   |
|--------------------------------------------------------------------------------------|---|
| 1. <sup>1</sup> H NMR, <sup>13</sup> C NMR and Mass Spectra for Synthesis .....      | 2 |
| 2. General Spectral Study of <b>CnN</b> and <b>CnOH</b> .....                        | 6 |
| 3. Density functional theory (DFT) calculations for <b>CnN</b> and <b>CnOH</b> ..... | 7 |
| 4. Cytotoxicity Assays and Cell Experiment.....                                      | 8 |

# 1. <sup>1</sup>H NMR, <sup>13</sup>C NMR and Mass Spectra for Synthesis

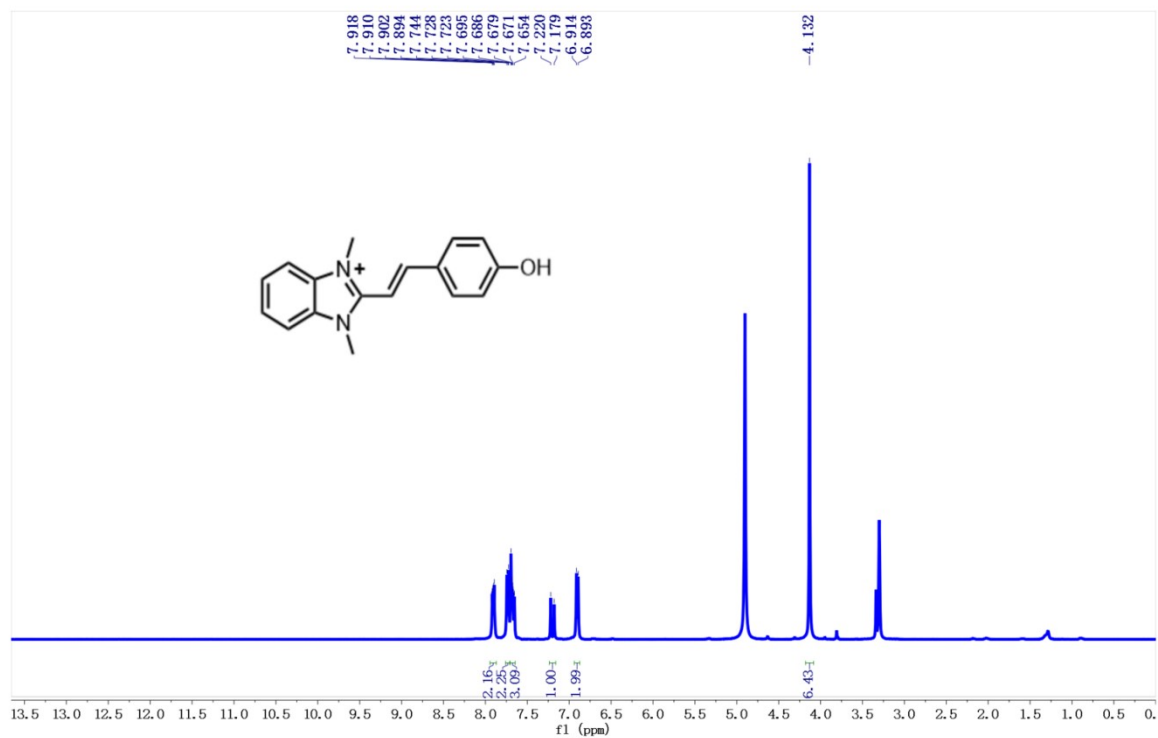

Fig. S1. <sup>1</sup>H NMR (400 MHz) spectrum of CnOH in MeOD.

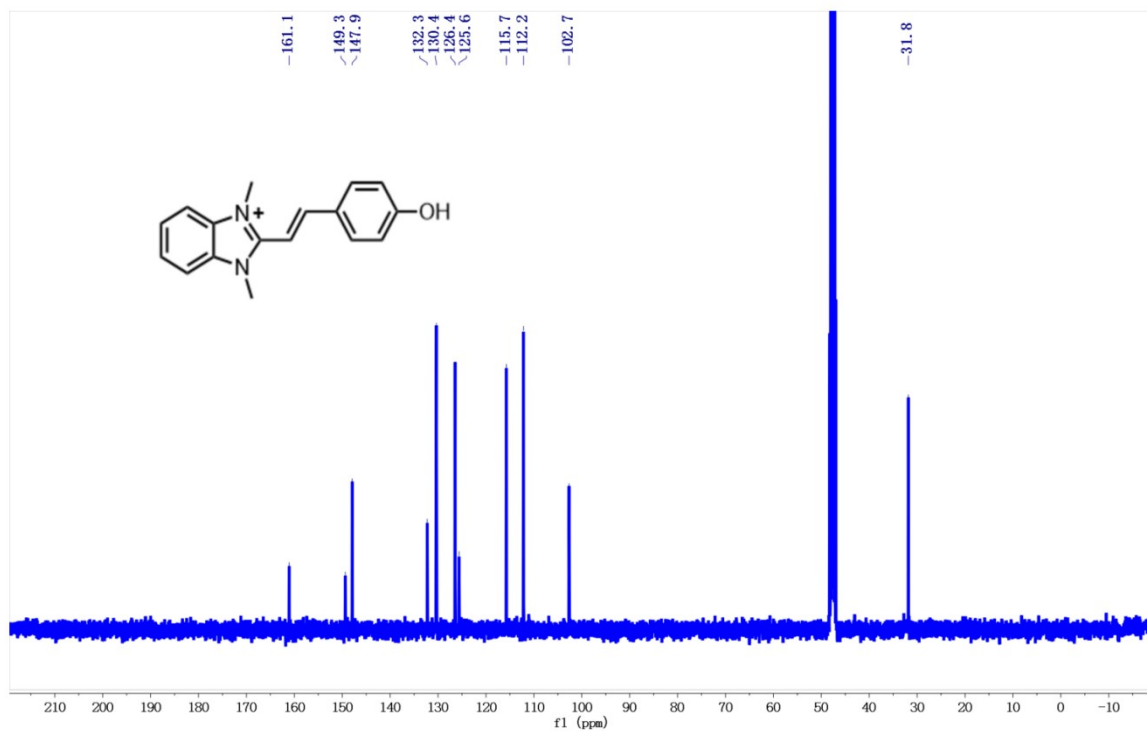

**Fig. S2.**  $^{13}\text{C}$  NMR (100 MHz) spectrum of **CnOH** in MeOD.

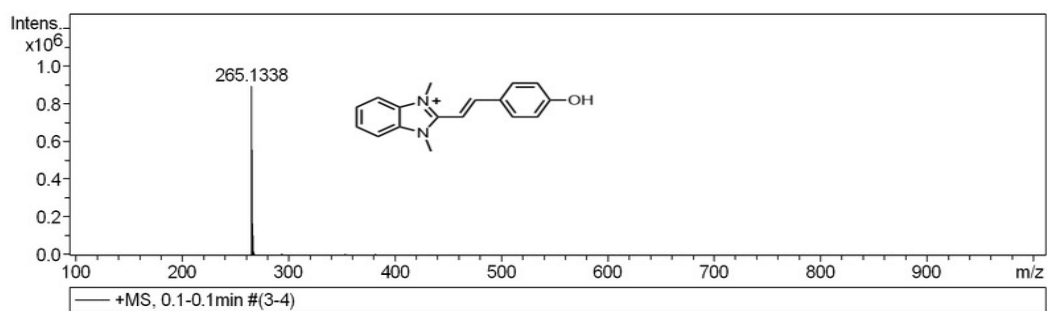

**Fig. S3.** High resolution mass spectrum of **CnOH**.

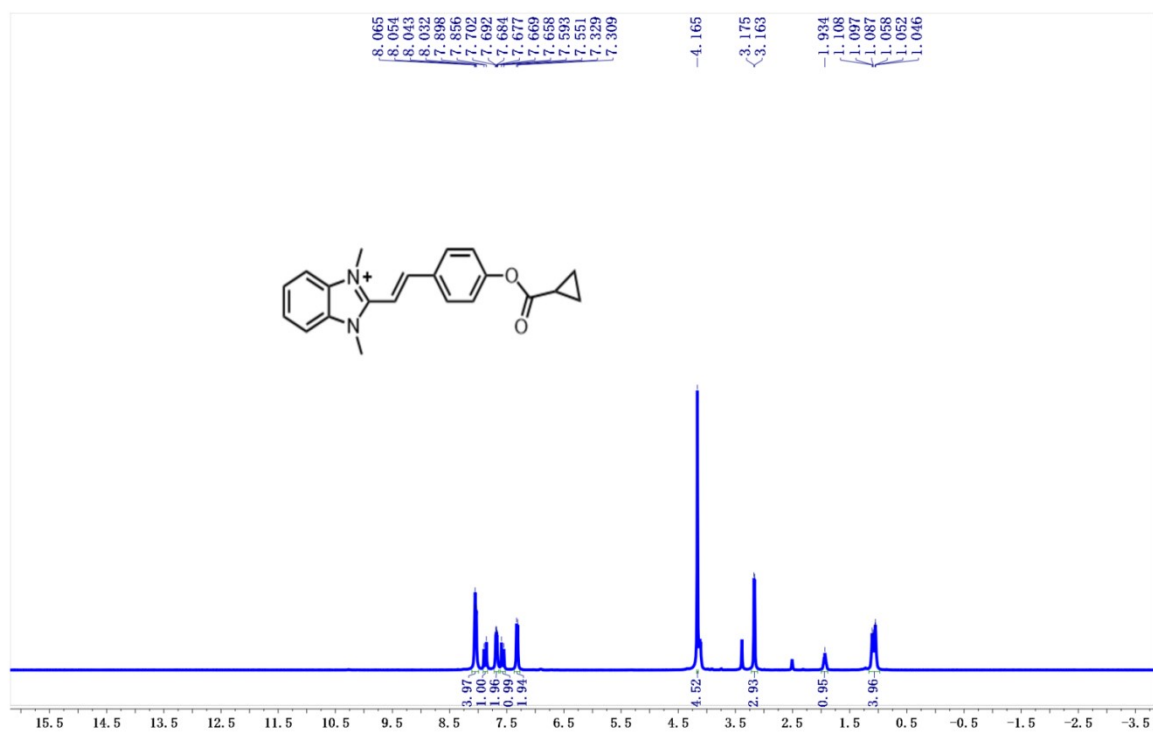

**Fig. S4.**  $^1\text{H}$  NMR (400 MHz) spectrum of **CnN** in DMSO- $d_6$ .

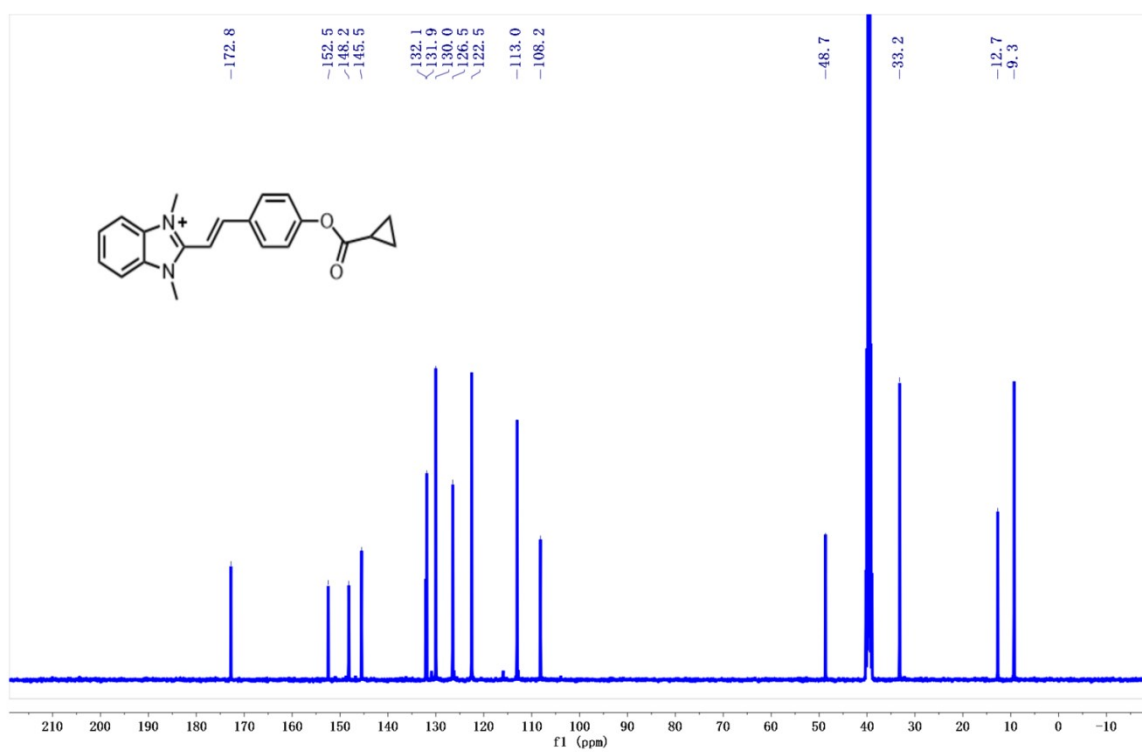

**Fig. S5.**  $^{13}\text{C}$  NMR (100 MHz) spectrum of CnN in DMSO- $d_6$ .

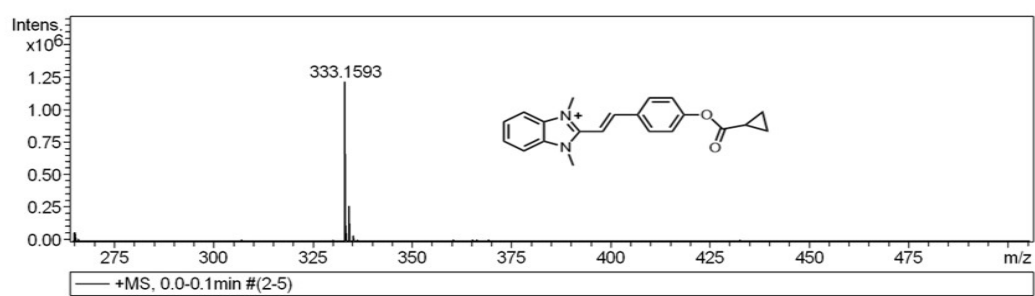

**Fig. S6.** High resolution mass spectrum of CnN.

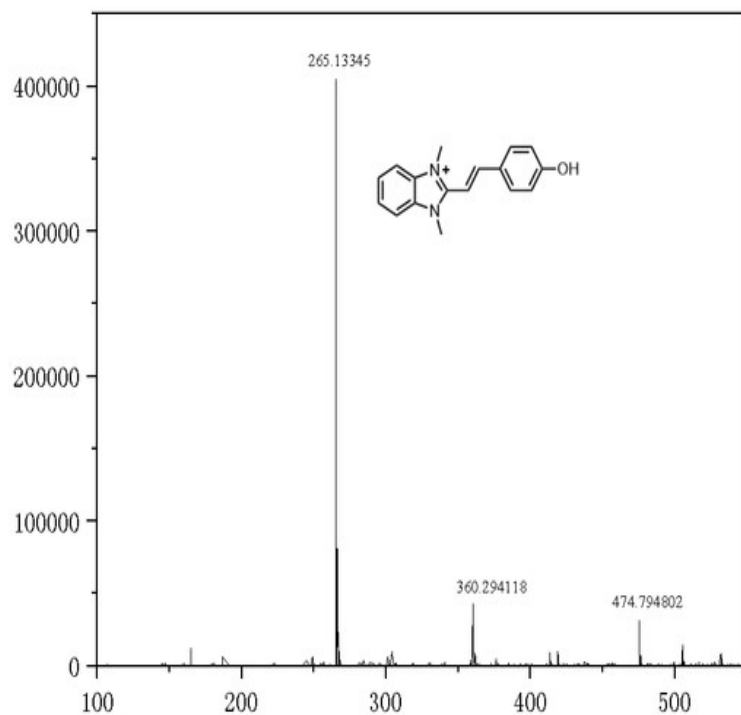

**Fig. S7.** Mass spectrometry of CnN reacted with BChE after 2h.

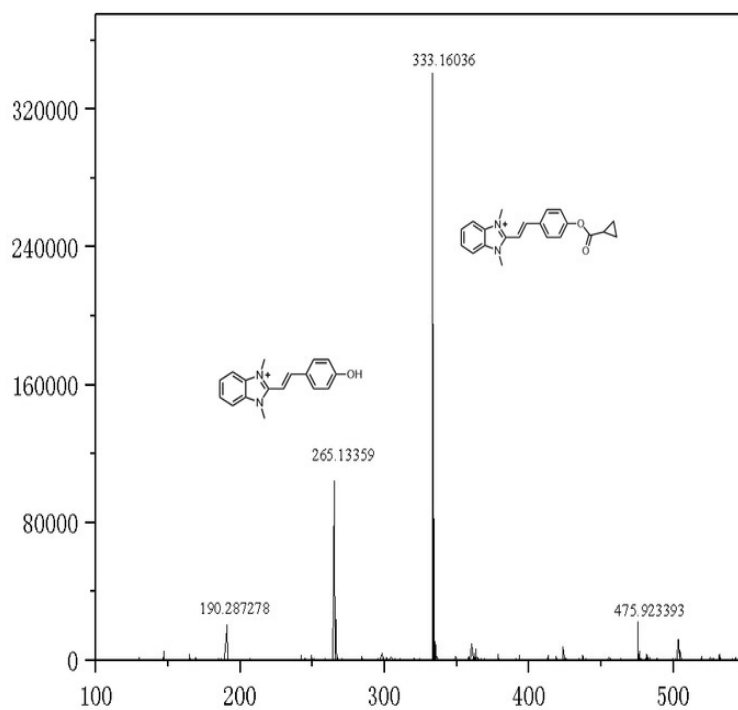

**Fig. S8.** Mass spectrometry of the reaction of CnN with BChE for 10 min.



## 2. General Spectral Study of CnN and CnOH

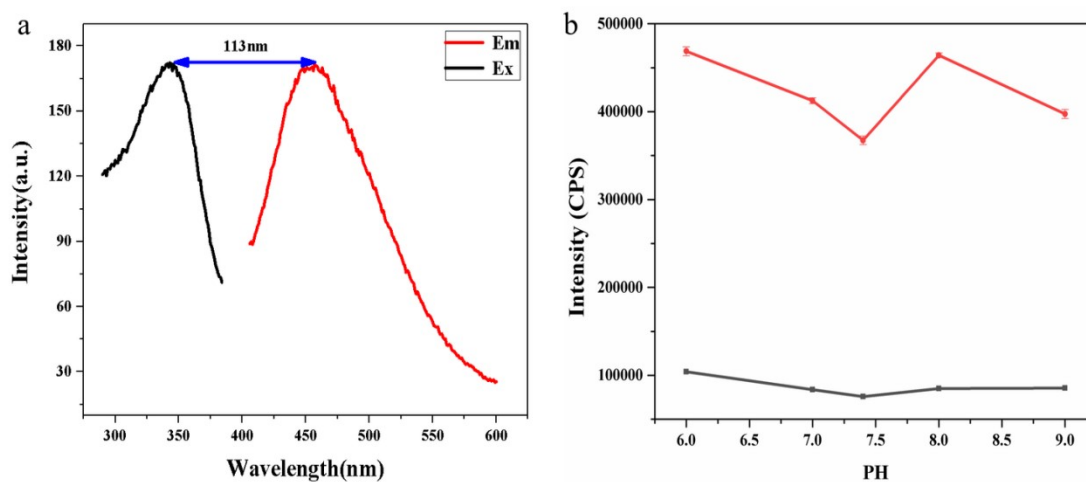

**Fig. S9.** (a) Excitation and emission spectra of CnOH (10.0  $\mu$ M) in 10 mM PBS buffer, pH 7.4. (b) Fluorescence intensity of 10.0  $\mu$ M CnN in the absence (black) and presence of 5.0 U/ml BChE (red) changed with excitation wavelength at 343 nm in the range of pH 6 to 9.

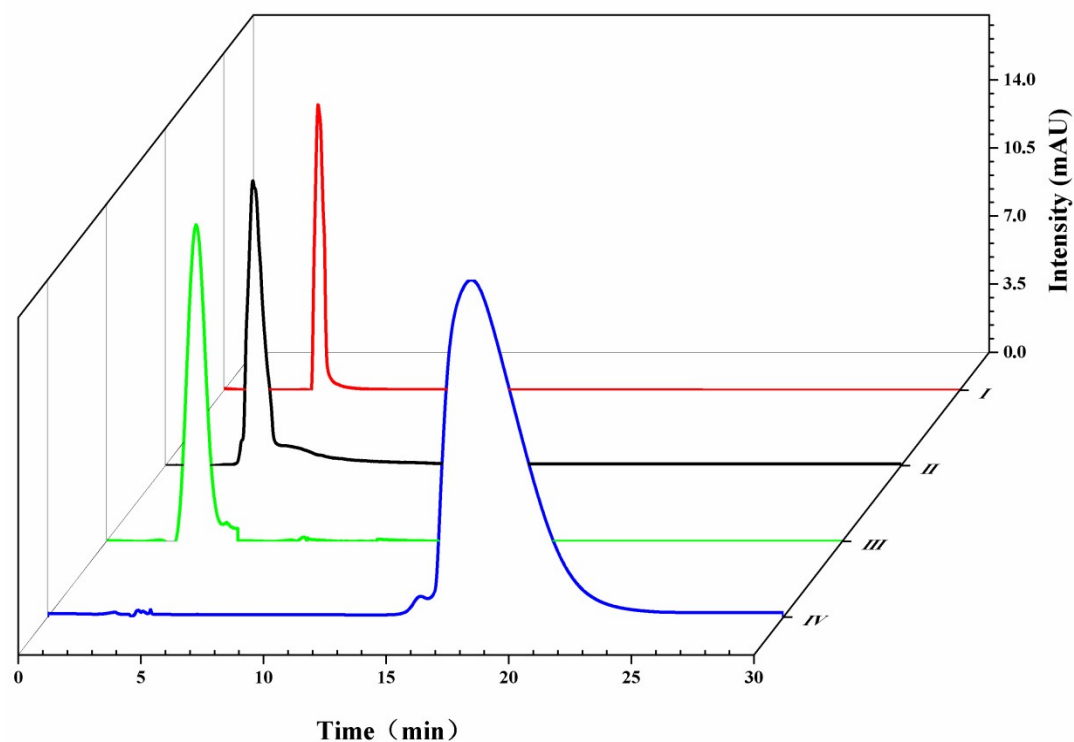

**Fig. S10.** (I) CnOH; (II) CnN reacted with AChE; (III) CnN reacted with BChE and (IV) CnN chromatograms. Mobile phase: solution A (25.0 mM ammonium acetate, pH 7.40), solution B (methanol);

A/B = 1.5/8.5 (v/v), flow rate 0.5 ml/min, detection wavelength 320 nm.



### 3. Density functional theory (DFT) calculations for CnN and CnOH

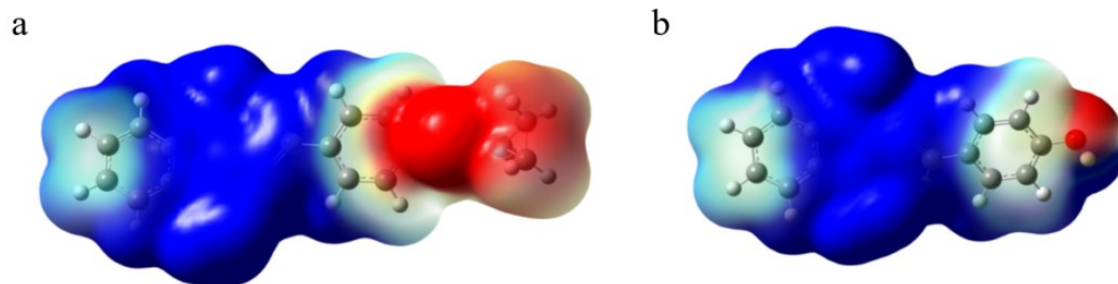

Fig. S11. Calculated the electrostatic potential of CnN (a) and CnOH (b).

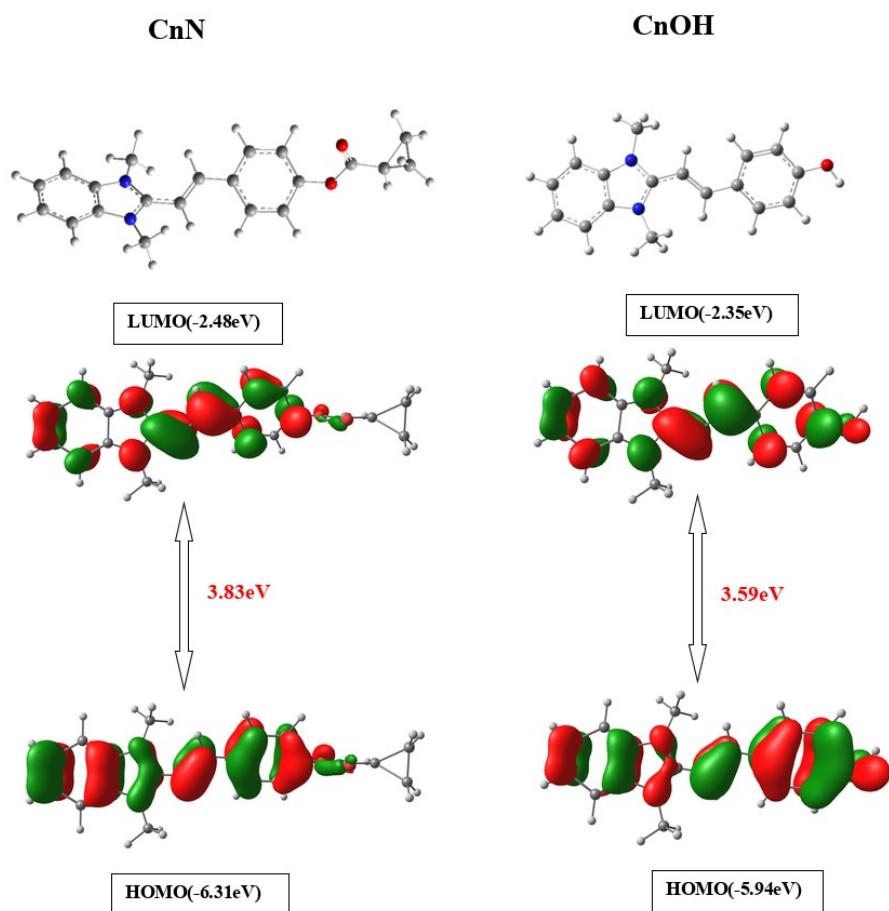

Fig. S12. Calculated frontier molecular orbitals and orbital energy levels for CnN and CnOH. In the ball

and stick model, the carbon, nitrogen, and oxygen atoms are marked in gray, blue, and red, respectively.

## 4. Cytotoxicity Assays and Cell Experiment

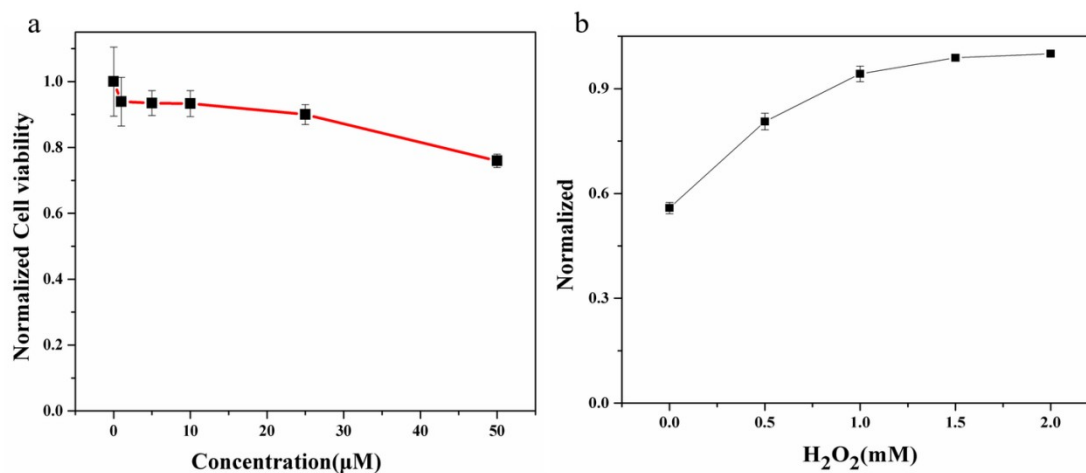

| NO  | Structure | LOD          | sensing mode | Response time | Stokes shift | Cytotoxicity (Viability/ Concentration) | Re.       |
|-----|-----------|--------------|--------------|---------------|--------------|-----------------------------------------|-----------|
| CnN |           | 0.07969 U/mL | turn-on      | 5 min         | 113 nm       | 90%(25 μM)                              | This work |
| 1   |           | -            | turn-on      | 30 min        | 45 nm        | 80%(20 μM)                              | 1         |
| 2   |           | 3.75 U/L     | turn-on      | 35 min        | 38 nm        | 80%(10 μM)                              | 2         |
| 3   |           | 0.8 U/L      | turn-on      | 90 min        | 48 nm        | 90%(20 μM)                              | 3         |

**Fig. S13.** (a) MTT assay for the survival rate of LO2 cells. (b) Analysis of fluorescence intensity under different hydrogen peroxide concentrations.

**Table S1.** Properties of representative fluorescent BChE probes.

|   |                                                                                     |                |              |        |        |                         |   |
|---|-------------------------------------------------------------------------------------|----------------|--------------|--------|--------|-------------------------|---|
| 4 | 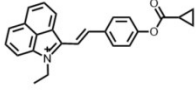   | 0.077<br>μg/mL | ratiometric  | 20 min | 141 nm | More than<br>90%(20 μM) | 4 |
| 5 |    | 29<br>ng/mL    | turn-on      | 10 min | 48 nm  | More than<br>90%(20 μM) | 5 |
| 6 |    | -              | turn-off     | 30 min | 165 nm | -                       | 6 |
| 7 |    | -              | turn-on      | -      | 65 nm  | 90%(20 μM)              | 7 |
| 8 | -                                                                                   | 6.8 U/L        | colorimetric | -      | -      | -                       | 8 |
| 9 |  | 1.2 U/L        | turn-on      | 2 min  | 145 nm | -                       | 9 |

#### References:

- 1 S. Liu, H. Xiong, J. Yang, S. Yang, Y. Li, W. Yang and G. Yang, *ACS. Sens.*, 2018, **3**, 2118–2128.
- 2 J. Ma, X. Lu, H. Zhai, Q. Li and Y. Guo, *Talanta.*, 2020, **219**, 121278.
- 3 Q. Zhang, C. Fu, X. Guo, J. Gao, P. Zhang and C. Ding, *ACS. Sens.*, 2021, **6**, 1138–1146.
- 4 C. Wan, J. Li, J. Gao, H. Liu, Q. Zhang, P. Zhang and C. Ding, *Dyes. Pigments.*, 2022, **197**, 109874.
- 5 T. Cao, L. Zheng, L. Zhang, Z. Teng, J. Qian, H. Ma, J. Wang, Y. Cao, W. Qin and Y. Liu, *Sen. Actuators. B: Chem.*, 2021, **330**, 129348.
- 6 S. Kang, S. Lee, W. Yang, J. Seo and M. Han, *Org. Biomol. Chem.*, 2016, **14**, 8815–8820.
- 7 S. Yang, Q. Sun, H. Xiong, S. Liu, B. Moosavi, W. Yang and G. Yang, *Chem. Commun.*, 2017, **53**, 3952–3955.
- 8 X. Wang, K. Koh and H. Chen, *Sen. Actuators. B: Chem.*, 2017, **251**, 869–876.

9 S. Yoo and M. Han, *Chem. Commun.*, 2019, **55**, 14574–14577.
